# Supplementary material for: A randomized controlled trial of online symptom searching to inform patient generated differential diagnoses
Source: PubMed Central journal article supplement (PMC6848180; doi:10.1038/s41746-019-0183-0), 2019-11-11
Supplement: 41746_2019_183_MOESM1_ESM.pdf [file 41746_2019_183_MOESM1_ESM.pdf]

## **Supplement**

Table of contents

Supplementary Figure 1 – page 2

Supplementary Figure 2 – page 3

Supplementary Table 1 – page 4-5

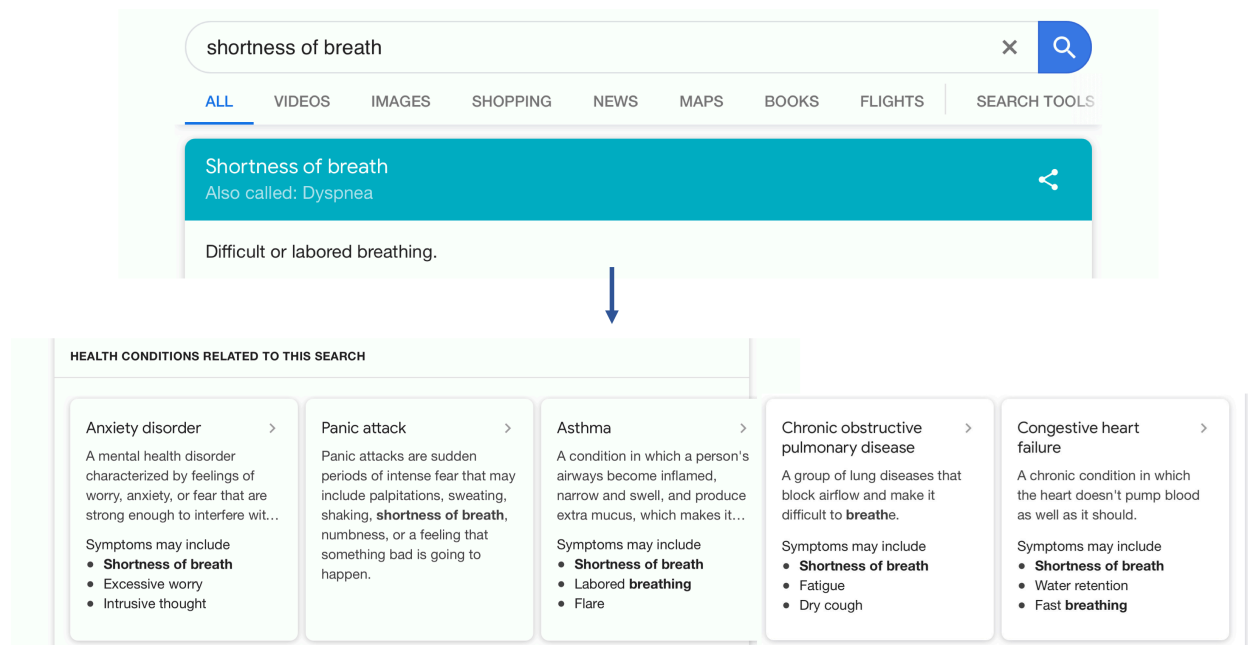

**Supplementary Figure 1. Screenshot example of mobile Google search with health related features.** When one searches on a mobile device for a symptom, such as “shortness of breath” or “trouble breathing”, one can scroll through health conditions related to the search (or, in other words, possible diagnoses for the symptom or symptoms). Google and the Google logo are registered trademarks of Google LLC, used with permission.

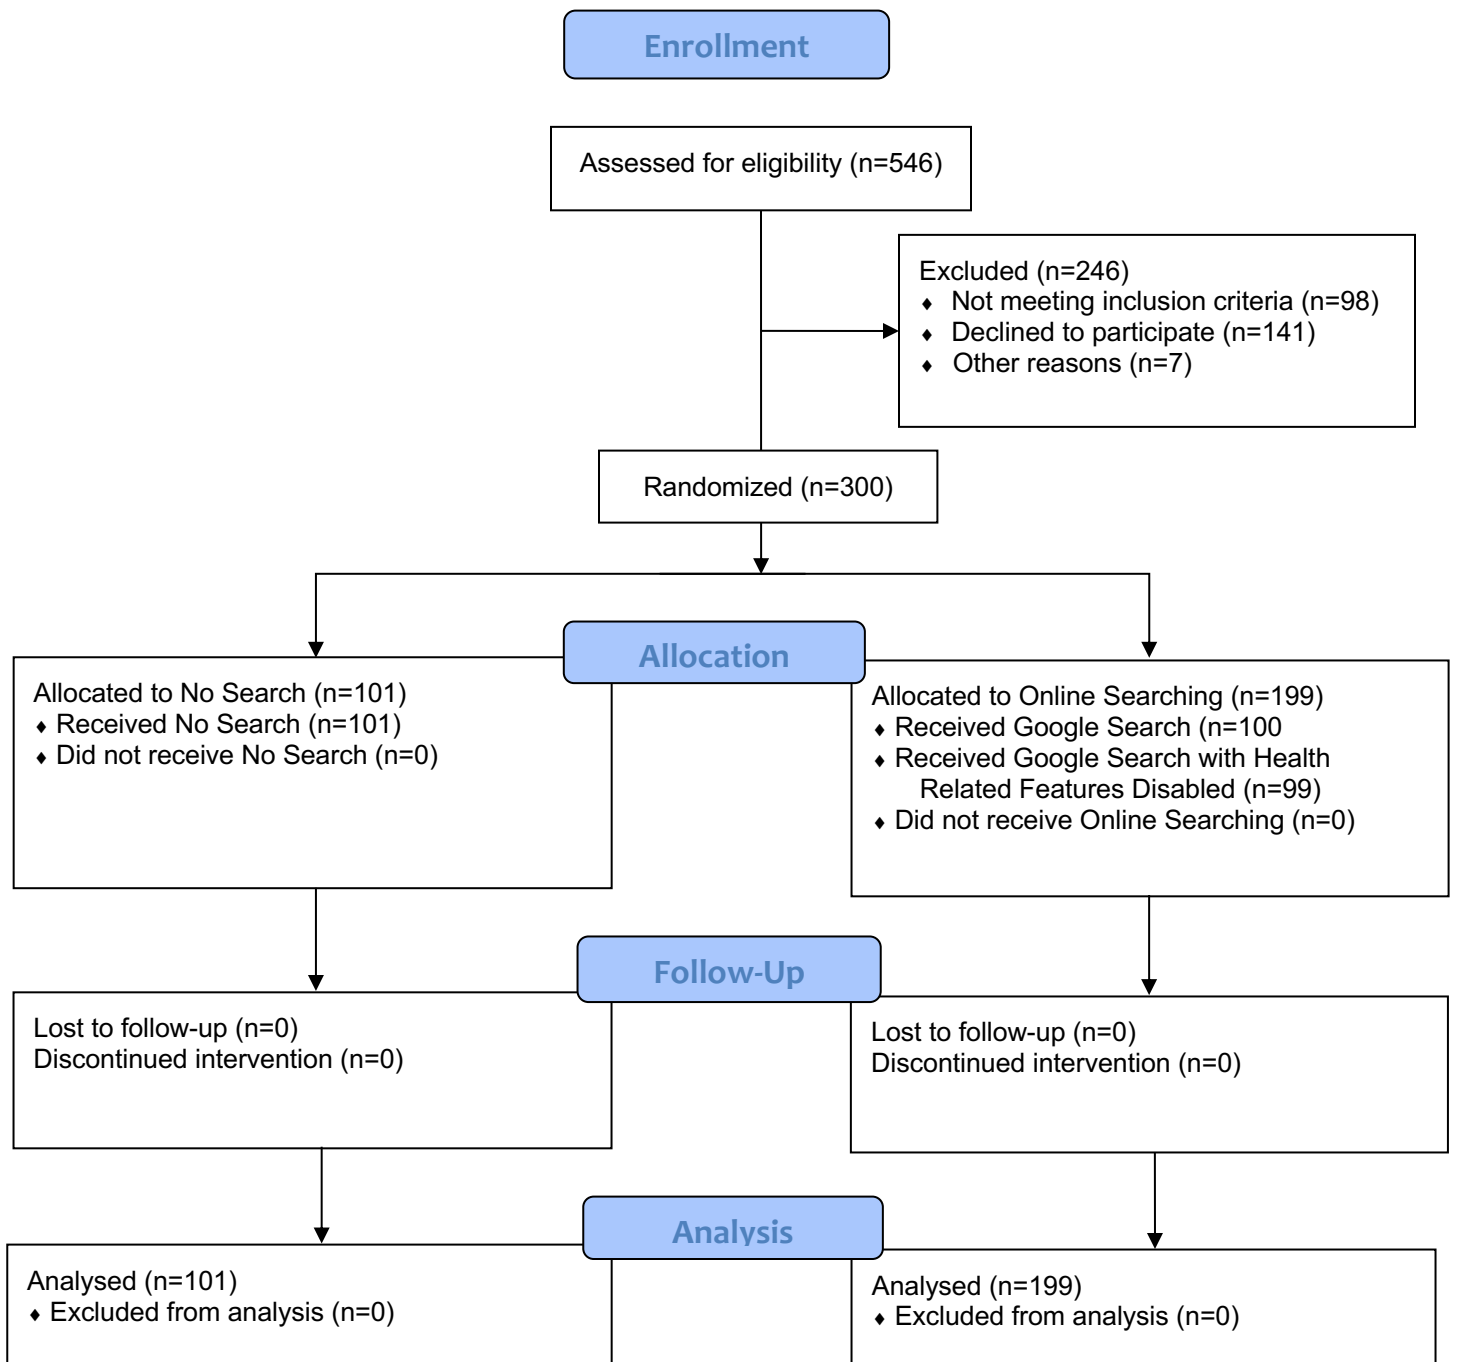

**Supplementary Figure 2. CONSORT flow diagram.**

**Supplementary Table 1. Quality of patient-clinician relationship as assessed post-visit by elements of patient satisfaction, clinician satisfaction, and clinician perception of online searching.**

|                                                                          | Median (interquartile interval) response score |                   |                |                       |         |
|--------------------------------------------------------------------------|------------------------------------------------|-------------------|----------------|-----------------------|---------|
|                                                                          | Overall (n=300)                                | No Search (n=101) | HFD (n=99)     | Google Search (n=100) | p-value |
| Patient satisfaction (range 0 – 100, from worse to better than usual)    |                                                |                   |                |                       |         |
| Satisfaction with the care you received                                  | 75 (50 - 100)                                  | 80 (50 - 100)     | 80 (50 - 100)  | 64.5 (50 - 100)       | 0.31    |
| Communication with clinician                                             | 80 (50 - 100)                                  | 80 (50 - 100)     | 89 (50 - 100)  | 80 (50 - 100)         | 0.71    |
| Feeling connected with clinician                                         | 75 (50 - 100)                                  | 75 (50 - 100)     | 80 (50 - 100)  | 75 (50 - 100)         | 0.92    |
| Speed of diagnosis                                                       | 80 (50 - 100)                                  | 80 (50 - 100)     | 80 (50 - 100)  | 75 (50 - 100)         | 0.81    |
| Length of visit                                                          | 61 (50 - 100)                                  | 70 (50 - 100)     | 60 (50 - 100)  | 53.5 (50 - 90)        | 0.24    |
| Shared decision making                                                   | 75 (50 - 100)                                  | 70 (50 - 100)     | 80 (50 - 100)  | 77.5 (50 - 100)       | 0.78    |
| Clinician satisfaction (range; 0 – 100, from worse to better than usual) |                                                |                   |                |                       |         |
| Satisfaction with the care you provided                                  | 51 (50 - 75)                                   | 52 (50 - 80)      | 50 (50 - 74)   | 51 (50 - 70)          | 0.46    |
| Communication with patient                                               | 60 (50 - 80)                                   | 60 (50 - 85)      | 53.5 (50 - 80) | 60 (50 - 80)          | 0.45    |
| Feeling connected with patient                                           | 55 (50 - 81)                                   | 60 (50 - 85)      | 51 (50 - 80)   | 59 (50 - 80.5)        | 0.69    |
| Speed of diagnosis                                                       | 57 (50 - 80)                                   | 55 (50 - 80)      | 56 (50 - 70)   | 60 (50 - 80)          | 0.56    |
| Length of visit                                                          | 50 (50 - 61.5)                                 | 52 (50 - 70)      | 52 (50 - 60)   | 50 (50 - 60)          | 0.27    |
| Shared decision making                                                   | 51 (50 - 79.5)                                 | 52 (50 - 80)      | 51 (50 - 75)   | 50 (50 - 71.5)        | 0.34    |
| Clinician perceptions                                                    |                                                |                   |                |                       |         |

|                                                                                                             |              |              |              |                |      |
|-------------------------------------------------------------------------------------------------------------|--------------|--------------|--------------|----------------|------|
| I felt the patient challenged my authority, n (%)                                                           | 8 (2.7)      | 4 (4.0)      | 2 (2.0)      | 2 (2.0)        | 0.74 |
| Patient brought up information during the visit that they found online                                      | 13 (4.3)     | 3 (3.0)      | 4 (4.0)      | 6 (6.0)        | 0.57 |
| Which of the following statements best describes the information that the patient brought up? <sup>a</sup>  |              |              |              |                | 0.26 |
| The patient was concerned about diagnoses that were in my differential                                      | 9 (69.2)     | 2 (66.7)     | 4 (100)      | 3 (50.0)       | -    |
| The patient was concerned about misleading/inappropriate diagnoses                                          | 0 (0)        | 0 (0)        | 0 (0)        | 0 (0)          | -    |
| Others                                                                                                      | 4 (30.8)     | 1 (33.3)     | 0 (0)        | 3 (50.0)       | -    |
| What impact did that information have on shared decision making? (range 0 – 100, from negative to positive) | 74 (50 - 85) | 74 (65 - 80) | 50 (50 - 75) | 82.5 (50 - 89) | 0.61 |

<sup>a</sup>Of the 13 participants who brought up information during the visit that they found online
